# Supplementary material
Source: PubMed Central journal article supplement (PMC7373389)
Supplement: mmc1.pdf [file mmc1.pdf]

## Supplementary appendix

This appendix formed part of the original submission and has been peer reviewed. We post it as supplied by the authors.

Supplement to: Pierce M, Hope H, Ford T, et al. Mental health before and during the COVID-19 pandemic: a longitudinal probability sample survey of the UK population. *Lancet Psychiatry* 2020; published online July 21. [http://dx.doi.org/10.1016/S2215-0366\(20\)30308-4](http://dx.doi.org/10.1016/S2215-0366(20)30308-4).

**Supplementary Table 1:** Characteristics of UKHLS Wave 8/9

participants by whether participated in the COVID-19 web-survey,  
unweighted analysis

|                                      | Responders (%)    | Non-responders (%)* |
|--------------------------------------|-------------------|---------------------|
| N                                    | 17,452            | 24,999              |
| Sex                                  |                   |                     |
| Men                                  | 7,287 (37.8)      | 11,994 (62.2)       |
| Women                                | 10,165 (43.9)     | 13,005 (56.1)       |
| Age, years                           |                   |                     |
| 16-24                                | 1,543 (31.4)      | 3,364 (68.6)        |
| 25-34                                | 1,950 (35.4)      | 3,556 (64.6)        |
| 35-44                                | 2,784 (41.0)      | 4,002 (59.0)        |
| 45-54                                | 3,506 (45.6)      | 4,176 (54.4)        |
| 55-69                                | 5,036 (50.8)      | 4,881 (49.2)        |
| 70 or more                           | 2,633 (34.4)      | 5,020 (65.6)        |
| Ethnicity                            |                   |                     |
| White British                        | 14,029 (44.9)     | 17,220 (55.1)       |
| White non-British                    | 779 (37.4)        | 1,302 (62.6)        |
| Mixed                                | 284 (35.5)        | 515 (64.5)          |
| Asian                                | 1,281 (24.9)      | 3,864 (75.1)        |
| Black                                | 392 (20.4)        | 1,532 (79.6)        |
| Other                                | 87 (26.1)         | 247 (74.0)          |
| Equivalent household income quintile |                   |                     |
| Lowest                               | 2,163 (27.7)      | 5,638 (72.3)        |
| 2 <sup>nd</sup>                      | 2,611 (32.7)      | 5,376 (67.3)        |
| 3 <sup>rd</sup>                      | 3,146 (38.1)      | 5,108 (61.9)        |
| 4 <sup>th</sup>                      | 3,957 (46.3)      | 4,597 (53.7)        |
| Highest                              | 4,395 (52.2)      | 4,026 (47.8)        |
| Age of youngest child in household   |                   |                     |
| None                                 | 12,221 (42.3)     | 16,682 (57.7)       |
| 0 to 5 years                         | 1,756 (33.6)      | 3,469 (66.4)        |
| 6 to 15 years                        | 3,475 (45.1)      | 4,228 (54.9)        |
| GHQ score (mean, $\pm$ SD)           | 11.2 ( $\pm$ 5.5) | 11.3 ( $\pm$ 5.7)   |

\* All participants in Waves 8 or 9 who did not take part in the Covid-19 web-survey, including those deemed ineligible. Raw data, before corrective weighting applied.

**Supplementary Table 2:** Mean GHQ-12 score and prevalence of clinically significant level of mental distress overall and by age and sex, by year

|                                                       | 2014-2015         | 2015-2016         | 2016-2017         | 2017-2018         | 2018-2019         | Apr-20            |
|-------------------------------------------------------|-------------------|-------------------|-------------------|-------------------|-------------------|-------------------|
| N                                                     | 26,979            | 44,024            | 39,984            | 33,540            | 12,312            | 17,452            |
| Mean GHQ-12 total                                     |                   |                   |                   |                   |                   |                   |
| Women, by age                                         |                   |                   |                   |                   |                   |                   |
| 16-24                                                 | 11.9 [11.5, 12.2] | 11.8 [11.5, 12.1] | 12.0 [11.7, 12.3] | 12.6 [12.2, 13.0] | 13.1 [12.4, 13.7] | 15.9 [15.2, 16.6] |
| 25-34                                                 | 11.5 [11.2, 11.8] | 11.4 [11.1, 11.6] | 11.9 [11.5, 12.2] | 12.4 [12.0, 12.8] | 12.3 [11.6, 12.9] | 15.3 [14.7, 16.0] |
| 35-44                                                 | 11.7 [11.4, 12.0] | 11.7 [11.4, 11.9] | 11.9 [11.6, 12.2] | 12.2 [11.9, 12.5] | 12.2 [11.6, 12.7] | 14.4 [13.8, 14.9] |
| 45-54                                                 | 11.7 [11.4, 11.9] | 11.9 [11.7, 12.1] | 12.2 [11.9, 12.4] | 12.5 [12.2, 12.8] | 12.6 [12.1, 13.1] | 13.2 [12.8, 13.6] |
| 55-69                                                 | 11.2 [11.0, 11.4] | 11.3 [11.1, 11.5] | 11.4 [11.2, 11.6] | 11.7 [11.5, 11.9] | 11.9 [11.5, 12.3] | 13.0 [12.7, 13.3] |
| >=70                                                  | 10.6 [10.4, 10.9] | 10.7 [10.5, 10.9] | 10.9 [10.7, 11.1] | 10.6 [10.4, 10.8] | 10.5 [10.2, 10.9] | 11.8 [11.4, 12.1] |
| Men, by age                                           |                   |                   |                   |                   |                   |                   |
| 16-24                                                 | 10.0 [9.7, 10.3]  | 9.8 [9.6, 10.1]   | 10.2 [9.9, 10.5]  | 10.5 [10.2, 10.9] | 11.1 [10.4, 11.8] | 13.1 [12.1, 14.1] |
| 25-34                                                 | 10.5 [10.1, 10.8] | 10.6 [10.3, 10.9] | 10.9 [10.5, 11.2] | 11.2 [10.8, 11.6] | 11.8 [10.9, 12.7] | 12.9 [12.2, 13.6] |
| 35-44                                                 | 10.6 [10.4, 10.9] | 10.7 [10.4, 10.9] | 10.9 [10.7, 11.2] | 11.1 [10.8, 11.4] | 11.3 [10.7, 11.8] | 12.2 [11.6, 12.8] |
| 45-54                                                 | 10.8 [10.5, 11.1] | 10.8 [10.6, 11.0] | 11.1 [10.8, 11.3] | 11.1 [10.9, 11.4] | 11.4 [10.9, 11.9] | 11.6 [11.2, 12.0] |
| 55-69                                                 | 10.0 [9.8, 10.2]  | 10.1 [9.9, 10.3]  | 10.5 [10.3, 10.7] | 10.6 [10.4, 10.8] | 10.4 [10.0, 10.7] | 10.9 [10.6, 11.3] |
| >=70                                                  | 9.8 [9.5, 10.0]   | 9.6 [9.4, 9.8]    | 9.9 [9.7, 10.1]   | 9.8 [9.6, 10.0]   | 9.6 [9.3, 9.9]    | 10.0 [9.7, 10.3]  |
| Proportion with significant level of mental distress* |                   |                   |                   |                   |                   |                   |
| Women, by age                                         |                   |                   |                   |                   |                   |                   |
| 16-24                                                 | 24.8 [22.1, 27.5] | 25.5 [23.3, 27.6] | 24.2 [22.0, 26.4] | 29.8 [27.2, 32.3] | 32.0 [27.5, 36.5] | 44.0 [39.2, 48.9] |
| 25-34                                                 | 21.0 [18.7, 23.3] | 20.2 [18.3, 22.1] | 23.0 [20.8, 25.1] | 24.5 [21.9, 27.1] | 24.3 [19.9, 28.7] | 40.4 [36.2, 44.6] |
| 35-44                                                 | 20.9 [18.9, 23.0] | 20.8 [19.1, 22.4] | 22.6 [20.7, 24.4] | 23.5 [21.3, 25.6] | 25.3 [21.5, 29.1] | 37.9 [34.6, 41.3] |
| 45-54                                                 | 20.7 [19.0, 22.5] | 21.3 [19.8, 22.9] | 22.9 [21.3, 24.6] | 24.6 [22.7, 26.5] | 25.6 [22.2, 29.0] | 31.3 [28.7, 34.0] |
| 55-69                                                 | 17.4 [16.1, 18.8] | 18.2 [17.0, 19.5] | 19.1 [17.7, 20.4] | 20.6 [19.2, 22.1] | 21.8 [19.2, 24.5] | 30.9 [28.7, 33.0] |
| >=70                                                  | 14.9 [13.2, 16.6] | 14.8 [13.4, 16.2] | 16.4 [14.9, 17.8] | 14.8 [13.3, 16.4] | 12.9 [10.6, 15.3] | 21.8 [19.0, 24.7] |

|             |                   |                   |                   |                   |                   |                   |
|-------------|-------------------|-------------------|-------------------|-------------------|-------------------|-------------------|
| Men, by age |                   |                   |                   |                   |                   |                   |
| 16-24       | 15.3 [13.0, 17.6] | 14.0 [12.3, 15.8] | 15.6 [13.6, 17.6] | 17.3 [15.0, 19.5] | 17.6 [13.5, 21.8] | 27.1 [21.2, 33.0] |
| 25-34       | 14.9 [12.5, 17.4] | 16.2 [14.1, 18.3] | 17.8 [15.5, 20.2] | 18.4 [15.8, 20.9] | 18.5 [13.6, 23.5] | 28.9 [24.3, 33.6] |
| 35-44       | 15.3 [13.3, 17.3] | 15.2 [13.4, 16.9] | 15.5 [13.8, 17.3] | 16.1 [14.0, 18.2] | 16.5 [12.9, 20.1] | 21.7 [18.4, 25.1] |
| 45-54       | 15.6 [13.8, 17.3] | 15.9 [14.4, 17.4] | 16.8 [15.2, 18.5] | 15.9 [14.2, 17.7] | 17.0 [13.5, 20.4] | 20.2 [17.4, 23.0] |
| 55-69       | 11.9 [10.6, 13.2] | 11.9 [10.7, 13.0] | 13.9 [12.6, 15.1] | 14.6 [13.1, 16.1] | 11.7 [9.5, 13.9]  | 17.9 [15.7, 20.0] |
| >=70        | 10.5 [8.9, 12.1]  | 10.5 [9.2, 11.9]  | 12.5 [10.9, 14.0] | 10.6 [9.2, 12.1]  | 8.3 [6.2, 10.3]   | 13.5 [11.1, 15.9] |

Sample sizes are true (unweighted). All analyses are weighted, adjusting for complex survey design and non-response.

\* GHQ-12 score 4 or more.

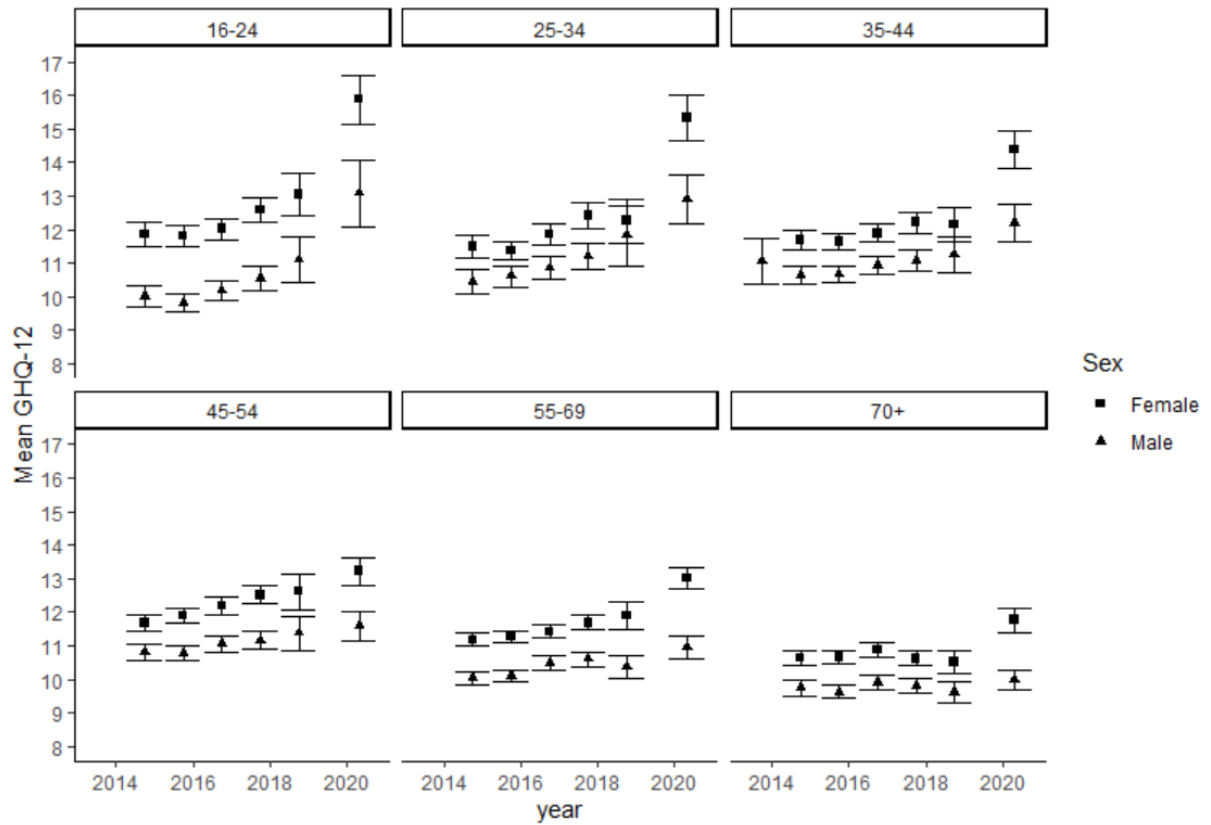

Supplementary Figure 1: Mean GHQ-12 score by age and sex, 2014-2020 weighted and adjusting for complex survey design and non-response.

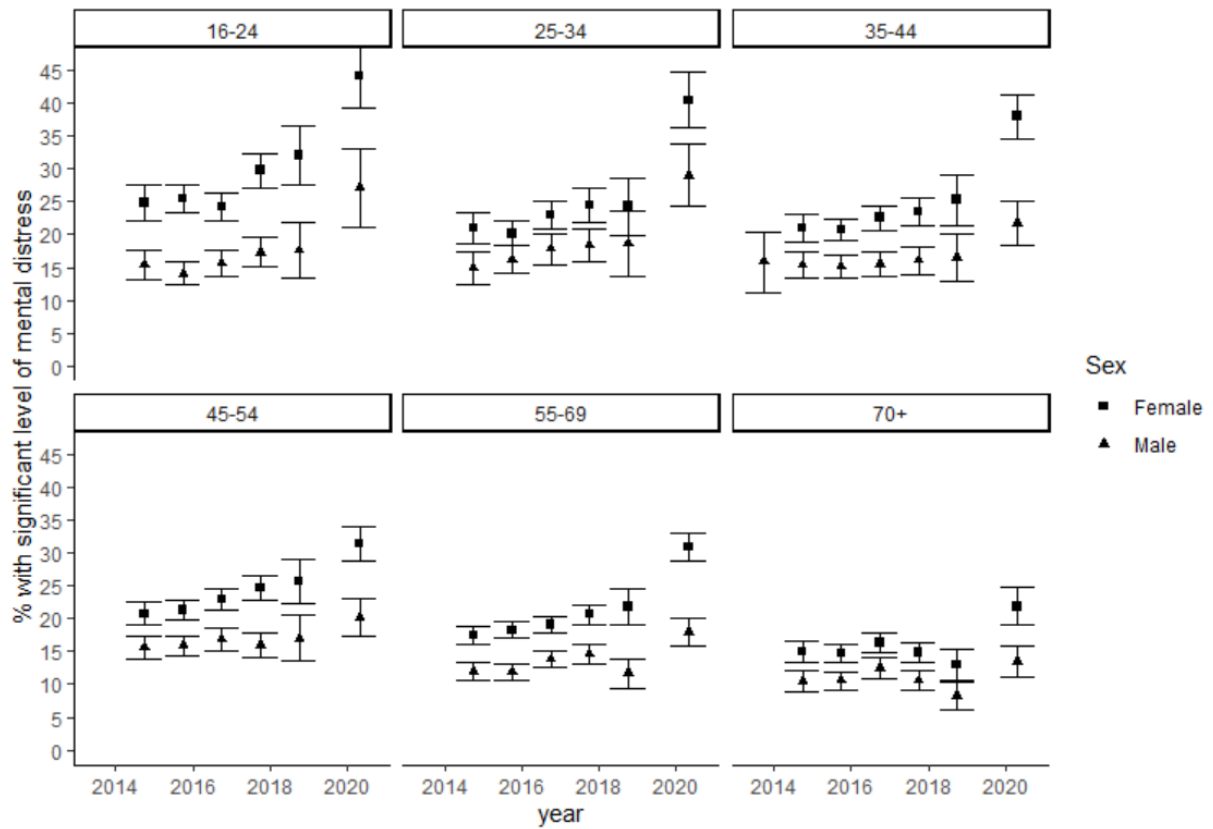

Supplementary Figure 2: Percentage significant level of mental distress by age and sex, 2014-2020 weighted and adjusting for complex survey design and non-response.
